# Supplementary material for: Using SMILES strings for the description of chemical connectivity in the Crystallography Open Database
Source: PubMed Central journal article supplement (PMC5959826; doi:10.1186/s13321-018-0279-6), 2018-05-18
Supplement: 13321_2018_279_MOESM1_ESM.pdf [file 13321_2018_279_MOESM1_ESM.pdf]

## **Using SMILES strings for the description of chemical connectivity in the Crystallography Open Database**

Miguel Quirós, Saulius Gražulis, Saulė Girdzijauskaitė, Andrius Merkys and Antanas Vaitkus.

**SUPPLEMENTARY MATERIAL**

**Table S-1:** Automatic changes performed by the *fixalot* script (as in revision 164).

| Functional group                               | Crude SMILES                                            | Fixed SMILES                                       |
|------------------------------------------------|---------------------------------------------------------|----------------------------------------------------|
| Perchlorate                                    | [Cl]([O])([O])([O])[O]<br>[O][Cl]([O])([O])[O]          | Cl(=O)(=O)(=O)[O-]<br>[O-]Cl(=O)(=O)=O             |
| Tetrafluoroborate                              | FB(F)(F)F<br>B(F)(F)(F)F                                | [B](F)(F)(F)[F-]<br>[B](F)(F)(F)[F-]               |
| Nitrate                                        | N(=O)(=O)[O]<br>O=N(=O)[O]                              | N(=O)(=O)[O-]<br>O=N(=O)[O-]                       |
| Hexafluorophosphate                            | FP(F)(F)(F)(F)F<br>P(F)(F)(F)(F)(F)F                    | [P](F)(F)(F)(F)(F)[F-]<br>[P](F)(F)(F)(F)(F)[F-]   |
| Tetraphenylborate                              | B bonded to 4 aromatic c                                | [B-]                                               |
| Imidazolylborate                               | B bonded to 3 nn or NN groups                           | [BH]                                               |
| Coordinated acetonitrile                       | [N][C]C                                                 | [N]#CC                                             |
| Azide (organic o monodentate)                  | [N]=[N+]=N<br>N=[N+]=[N]                                | N#N=N<br>N=N#N                                     |
| Coordinated chloride<br>(idem bromide, iodide) | [Cl-] (non isolated)                                    | Cl                                                 |
| Tetrachlorometalates<br>(oxidation state +3)   | [Fe](Cl)(Cl)(Cl)Cl<br>(also Al, Au)                     | [Fe](Cl)(Cl)(Cl)[Cl-]                              |
| Tetrachlorometalates<br>(oxidation state +2)   | [Co](Cl)(Cl)(Cl)Cl<br>(also Zn, Cd, Pd, Pt, Cu)         | [Co](Cl)(Cl)([Cl-])[Cl-]                           |
| Metal carbonyl                                 | [C][O]                                                  | C#[O]                                              |
| Metal isocyanide                               | [C][N]                                                  | C#[N]                                              |
| Borane                                         | At least one B bonded to 3+ B                           | [BH]                                               |
| Diazo compound                                 | [N][N]                                                  | /N=N/                                              |
| Nitroso group                                  | [N][O]                                                  | N=O                                                |
| Coordinated DMF                                | O[CH]N(C)C                                              | [O]=CN(C)C                                         |
| DMSO                                           | O[S](C)C<br>[O][S](C)C<br>[S]([O])(C)C<br>S([O])(C)C    | [O]=S(C)C<br>[O]=S(C)C<br>S(=O)(C)C<br>[S](=O)(C)C |
| Organic imine                                  | [CH][N]<br>[N][CH]                                      | /C=N/<br>/N=C/                                     |
| Coordinated imine                              | [CH]Nx x=(1..9)<br>[CH]N%<br>Nx[CH] x=(1..9)<br>N([CH]) | C=[N]x<br>C=[N]%<br>[N]x=C<br>[N](=C               |
| Phosphane complexes                            | P bonded to metal                                       | [P]                                                |
| Sulfonate                                      | S(=O)(=O)[O]<br>S(=O)(=O)([O])                          | S(=O)(=O)[O-]<br>S(=O)(=O)([O-])                   |
| Interstitial water                             | Isolated [O]                                            | O                                                  |
| Oxo groups                                     | [O] bonded to V, Cr, Mo, W, Tc,<br>Re, U, Np, Pu        | =O                                                 |
| Ether complexes<br>(idem thioether)            | [O@H]<br>[O@@H]                                         | [O]<br>[O]                                         |

## Examples of COD entries with wrong compound names in the CIF

20 entries are listed, showing the name indicated in the CIF, the SMILES that reflects that name (obtained by OPSIN), the correct nomenclature and the SMILES deduced from atom coordinates (this work).

This is only a small sample set: many entries included in the last four rows in Table 4 display discrepancies between OPSIN output and the results of this work because of wrong compound names in the CIF. There are for sure several hundreds like these in the studied subset.

1008034

Name in CIF: Tungsten fluoride

SMILES obtained by OPSIN: F[W](F)(F)F

Correct name: Tungsten hexafluoride

SMILES in allcod.smi: [W](F)(F)(F)(F)(F)F

1505352

Name in CIF: spiro[1,3-benzodioxine-2,1'-cyclohexane]

SMILES obtained by OPSIN: C1CCC2(CC1)OCc1c(O2)cccc1

Correct name: spiro[4,4-diphenyl-1,3-benzodioxine-2,1'-(4'-phenyl)-cyclohexane]

SMILES in allcod.smi: C12(CCC(CC1)c1cccc1)Oc1ccc(cc1C(c1cccc1)(c1cccc1)O2)OC

1505894

Name in CIF: vinylcyclopentan

SMILES obtained by OPSIN: C=CC1CCCC1

Correct name: 1R,2S,3R,4S-1-hydroxyethyl-1-terbutyldimethylsiloxy-3-hydroxy-4-methyl-2-vinyl-cyclopentane.

SMILES in allcod.smi: O[C@@H]1[C@H](C[C@@](O[Si](C(C)(C)C)(C)C[C@H]1C=C)CO)C

2011584

Name in CIF: 1-[4,6-dimethylthio-2H-pyrazolo[3,4-d]pyrimidin-2-yl]-4,6-dimethylthio-1H-pyrazolo[3,4-d]pyrimidine

SMILES obtained by OPSIN: CSc1nc(SC)c2c(n1)nn(c2)n1ncc2c1nc(SC)nc2SC

Correct name: 1-(4,6-dimethylthio-2H-pyrazolo[3,4-d]pyrimidin-1-yl)-3-(4,6-dimethylthio-2H-pyrazolo[3,4-d]pyrimidin-2-yl)-propane

SMILES in allcod.smi: n1n(cc2c(SC)nc(SC)nc12)CCc1ncc2c(SC)nc(SC)nc12

2016225

Name in CIF: 3-aminopyrimidinium 3-carboxy-4-hydroxybenzenesulfonate

SMILES obtained by OPSIN: OC(=O)c1cc(ccc1O)S(=O)(=O)[O-].NN1C[NH+]=CC=C1

Correct name: 3-aminopyridinium 3-carboxy-4-hydroxybenzenesulfonate

SMILES in allcod.smi: c1(c(ccc(c1)S(=O)(=O)[O-])O)C(=O)O.c1c(ccc[nH+]1)N

2102504

Name in CIF: 1-phenyl-4-nitro-5-bromo-imidazole

SMILES obtained by OPSIN: [O-][N+](=O)c1ncn(c1Br)c1cccc1

Correct name: 1-phenyl-2-methyl-4-nitro-5-bromo-imidazole

SMILES in allcod.smi: n1(c2cccc2)c(C)nc(N(=O)=O)c1Br

2201456

Name in CIF: 3,5-dimethyl-2H-pyrazol-1-ium phosphonic acid diphenyl ester

SMILES obtained by OPSIN: O=P(Oc1ccccc1)Oc1ccccc1.Cc1[nH+][nH]c(c1)C

Correct name: 3,5-dimethyl-2H-pyrazol-1-ium diphenyl phosphate

SMILES in allcod.smi: P(=O)([O-])(Oc1ccccc1)Oc1ccccc1.[nH+]1[nH]c(C)cc1C

2206336

Name in CIF: Bis[2-(1-phenyl-1H-tetrazol-5-ylsulfanyl)ethoxy] ether

SMILES obtained by OPSIN: O(OCCSc1nnnn1c1ccccc1)OCCSc1nnnn1c1ccccc1

Correct name: 1,2-Bis[2-(1-phenyl-1H-tetrazol-5-ylsulfanyl)ethoxy]-ethane

SMILES in allcod.smi: C(OCCSc1nnnn1c1ccccc1)COCCSc1nnnn1c1ccccc1

2203500

Name in CIF: 2-benzyl-6-diethylamino-4-phenyl-2H-1,3,5-thiadiazine-2-carboxylate

SMILES obtained by OPSIN: CCN(C1=NC(=NC(S1)(Cc1ccccc1)C(=O)[O-])c1ccccc1)CC

Correct name: Methyl 2-benzyl-6-diethylamino-4-phenyl-2H-1,3,5-thiadiazine-2-carboxylate

SMILES in allcod.smi: S1C(=NC(=NC1(C(=O)OC)Cc1ccccc1)c1ccccc1)N(CC)CC

2209648

Name in CIF: Bis[2-(2-isopropylphenylimino)phenyl]mercury(II)

SMILES obtained by OPSIN:

CC(c1ccccc1N=C1C=CC=CC1[Hg-]C1C=CC=CC1=Nc1ccccc1C(C)C)C

Correct name: Bis[2-(2-isopropylphenyliminomethyl)phenyl]mercury(II)

SMILES in allcod.smi: [Hg](c1ccccc1/C=N/c1ccccc1C(C)C)c1ccccc1/C=N/c1ccccc1C(C)C

2212657

Name in CIF: 2-[4-(Diethylamino)phenyl]-1-ethylimidazo[4,5-f][1,10]phenanthroline

SMILES obtained by OPSIN: CCN(c1ccc(cc1)c1nc2c(n1CC)c1cccnc1c1c2cccn1)CC

Correct name: 2-[4-(Diphenylamino)phenyl]-1-ethylimidazo[4,5-f][1,10]phenanthroline

SMILES in allcod.smi:

n1cccc2c3n(CC)c(nc3c3cccnc3c12)c1ccc(N(c2ccccc2)c2ccccc2)cc1

2233448

Name in CIF: Benzoic acid--3,4-bis[(pyridin-3-ylmethyl)amino]cyclobut-3-ene-1,2-dione (1/2)

SMILES obtained by OPSIN:

O=C1C(=O)C(=C1NCc1cccnc1)NCc1cccnc1.O=C1C(=O)C(=C1NCc1cccnc1)NCc1cccnc1

.OC(=O)c1ccccc1

Correct name: Benzoic acid--3,4-bis[(pyridin-3-ylmethyl)amino]cyclobut-3-ene-1,2-dione (2/1)

SMILES in allcod.smi:

O=C1C(=O)C(=C1NCc1cccnc1)NCc1cccnc1.OC(=O)c1ccccc1.OC(=O)c1ccccc1

2239483

Name in CIF: 5-Bromo-3-cyclohexylsulfinyl-2,4,6-trimethyl-1-benzofuran

SMILES obtained by OPSIN: Cc1oc2c(c1S(=O)C1CCCCC1)c(C)c(c(c2)C)Br

Correct name: 5-Bromo-3-cyclohexylsulfonyl-2,4,6-trimethyl-1-benzofuran

SMILES in allcod.smi: Cc1oc2c(c1S(=O)(=O)C1CCCCC1)c(C)c(c(c2)C)Br

2240483

Name in CIF: 1-Benzylsulfonyl-1,2,3,4-tetrahydroquinoline

SMILES obtained by OPSIN: O=S(=O)(N1CCCc2c1cccc2)Cc1cccc1

Correct name: N'-(3-tolyl)-dithio-benzyl-hydrazide

SMILES in allcod.smi: S(C(=S)NNc1cc(ccc1)C)Cc1cccc1

4331494

Name in CIF: 1,5-Diamino-1H-tetrazolium iodide

SMILES obtained by OPSIN: N[NH+]1N=NN=C1N.[I-]

Correct name: 1,5-Diamino-4-methyl-1H-tetrazolium iodide

SMILES in allcod.smi: [I-].n1(nn[n+](c1N)C)N

7008105

Name in CIF: 1-dimethylphosphino-2,2-dimethylhydrazine

SMILES obtained by OPSIN: CN(NP(C)C)C

Correct name: 1-diphenylphosphino-2,2-dimethylhydrazine

SMILES in allcod.smi: P(NN(C)C)(c1cccc1)c1cccc1

7013905

Name in CIF: Manganese(II)-di-chloro-2-((bis(pyridin-2-ylmethyl)amino)methyl)-4-nitrophenol

SMILES obtained by OPSIN: Oc1cc(Cl)c(c(c1CN(Cc1ccccn1)Cc1ccccn1)Cl)[N+](=O)[O-].

[Mn+2]

Correct name: (2-((bis(pyridin-2-ylmethyl)amino)methyl)-4-nitrophenol)-di-chloro-manganese(II) monomethanol solvate

SMILES in allcod.smi: [Mn]12(Cl)(Cl)[N](Cc3[n]1cccc3)

(Cc1[n]2cccc1)Cc1c(O)ccc(N(=O)=O)c1.OC

7106864

Name in CIF: ((1S,3S)-6,7-dimethoxy-1-phenyl-1,2,3,4-tetrahydroisoquinolin-3-yl)methanol

SMILES obtained by OPSIN: OC[C@@H]1Cc2cc(OC)c(cc2[C@@H](N1)c1cccc1)OC

Correct name: (S-1,2,3,4-tetrahydroisoquinolin-3-yl)methanol

SMILES in allcod.smi: C1c2cccc2C[C@@H](CO)N1

7153382

Name in CIF: rhenium cyclohexylnicotinamide

SMILES obtained by OPSIN: NC(=O)c1ccnc1C1CCCCC1.[Re]

Correct name: tri-carbonyl-(bipyridine)-(N-cyclohexylnicotinamide)-rhenium(I) triflate

SMILES in allcod.smi: c1cccc2c3cccc[n]3[Re](C#[O])(C#[O])(C#[O])([n]12)

[n]1cccc(c1)C(=O)NC1CCCCC1.C(S(=O)(=O)[O-])(F)(F)F

8000096

Name in CIF: anthryldiphosphene

SMILES obtained by OPSIN: P=Pc1c2cccc2cc2c1cccc2

Correct name: P-(anthryl)-P'-(2,4,6-tris(bis(trimethylsilyl)methyl)-phenyl)-diphosphene.

SMILES in allcod.smi: P(=Pc1c(cc(cc1C([Si](C)(C)C)[Si](C)(C)C)C([Si](C)(C)C)[Si](C)(C)C)C([Si](C)(C)C)[Si](C)(C)C)c1c2cccc2cc2cccc12
